# Supplementary material for: Primary school teachers’ perceptions of mental health promotion in schools and factors explaining their commitment
Source: Research Square preprint supplement (doi:10.21203/rs.3.rs-8497600/v1), 2026-01-29
Supplement: Supplementary file 1 [file 59cfb147f8c2d1f27ac838c0.docx]

**Interview Guide**

for in-depth individual interviews

English language version

Study on

**Primary school teachers’ perceptions of mental health promotion in schools and factors explaining their commitment**

Dear Sir, Madam,

We sincerely thank you for agreeing to participate in this study, which focuses on primary school teachers' perceptions of mental health promotion in schools and the factors that explain their commitment to health promotion in schools. This study aims to understand what is being done in the field in order to advocate for the revitalisation of mental health promotion in schools.

After signing the consent form, we ask that you answer this interview freely. We remind you that i) the information collected as part of this study will remain confidential and will be treated anonymously, and ii) you have the right at any time to ask questions for clarification, to continue or to interrupt the interview.

I. General information

1.1 Interviewer(s): _______________________ 1.2 Interviewee/FGD (unique ID): #__________

1.3 Date (dd/mm/yyyy): ___/___/______ 1.4 Time of interview/FGD: _____h/_____min

1.5 Profile of interviewee (if in-depth interview): ________________________________________

1.6 School where the meeting is being held: ____________________________________________

II. Questions

Perceptions section

1. What do you personally know about mental health and mental health promotion in schools?

2. What does mental health promotion in schools mean to you?

*Relaunch:*

*Tell us about your position on mental health promotion in schools.*

3. Tell us what you understand about mental health promotion in schools.

*[Follow-up] In your opinion, what might be involved?*

4. Do you feel that the school is doing anything to promote mental health (image and feelings)?

*Relaunch:*

*How can you tell?*

*Regarding the acquisition of psychosocial skills*

*Regarding the teacher-student relationship*

*Regarding the school environment*

*Regarding mental health education*

*Regarding the screening (detection or identification) of students with problems*

*Regarding psychological support (counselling, etc.) for students with problems*

*Regarding the guidance of students with mental health problems*

5. What are your needs and expectations in terms of promoting mental health at school?

*Relaunch:*

*In your opinion, what exactly should be done to promote mental health at school?*

Factors explaining commitment

6. Tell us about your commitment to promoting mental health at school

7. Tell us a little about what motivates you (or could motivate you) to get involved in promoting mental health at school

*Relaunch:*

*What naturally puts you in a position to promote health (predisposing factors)*

*What, in your environment, supports you in this role (reinforcing factors)*

*What makes your role in promoting mental health at school easier (facilitating factors)*

*What hinders you in your role in promoting mental health at school (limiting factors)*

General information about (each of) the respondent(s) – socio-professional data

1. How old were you on your last birthday? Age in years |__|__|

2. What is your gender? Female |__| Male |__|

3. What is your marital status? Married/in a civil partnership |__| Common-law spouse/in a relationship |__| Separated |__| Divorced |__| Widowed |__| Single |__| Religious teachers are excluded from the study.

4. What is your current professional status?

Full-time teacher |__| Part-time teacher |__| Other |__| …………………

5. How many years have you been in the teaching profession to date?

0–2 years |__| 3–5 years |__| 6–8 years |__| 9+ years |__|

6. What is your income bracket?

< CDF250,000 |__| CDF250,000- CDF350,000 |__| CDF350,000- CDF450,000 |__| Over CDF450,000 |__|

7. Have you ever taken a course or seminar related to mental health? Yes|__| No|__|

Thank you for your cooperation.
